# Supplementary material
Source: PubMed Central journal article supplement (PMC3645937)

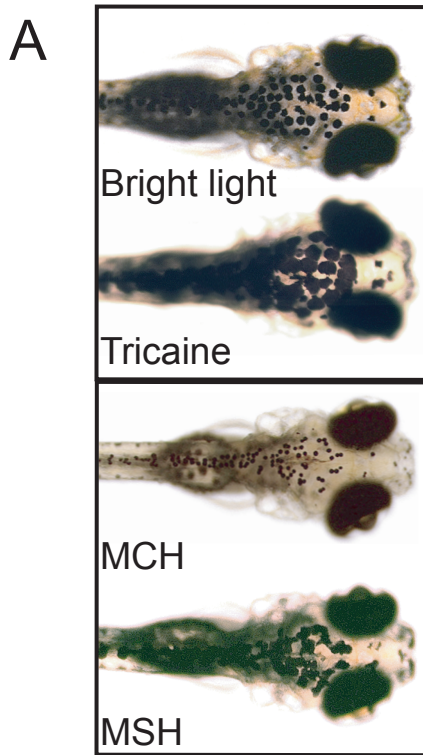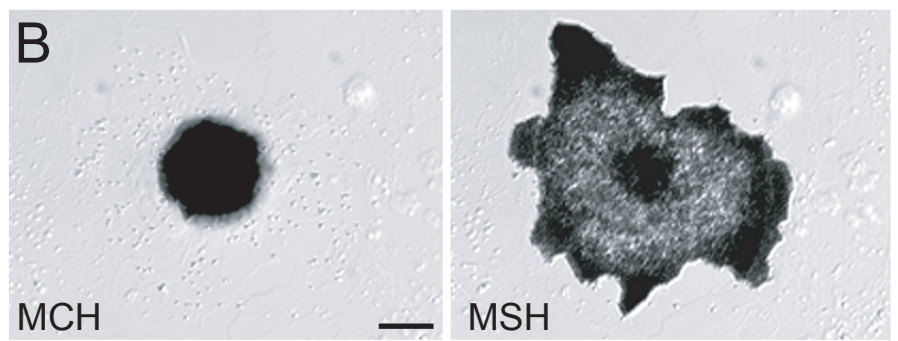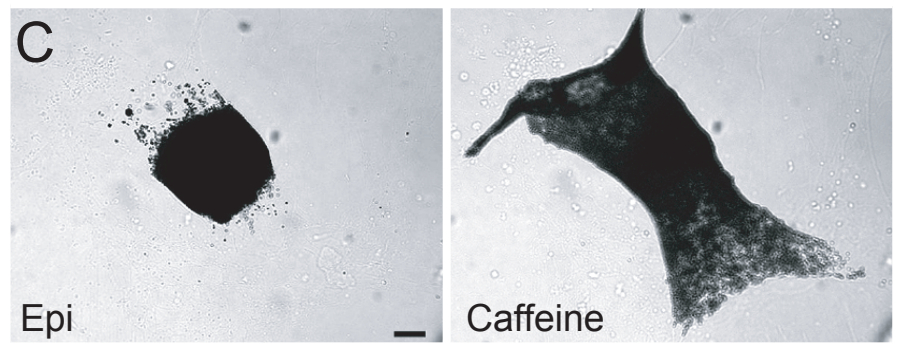

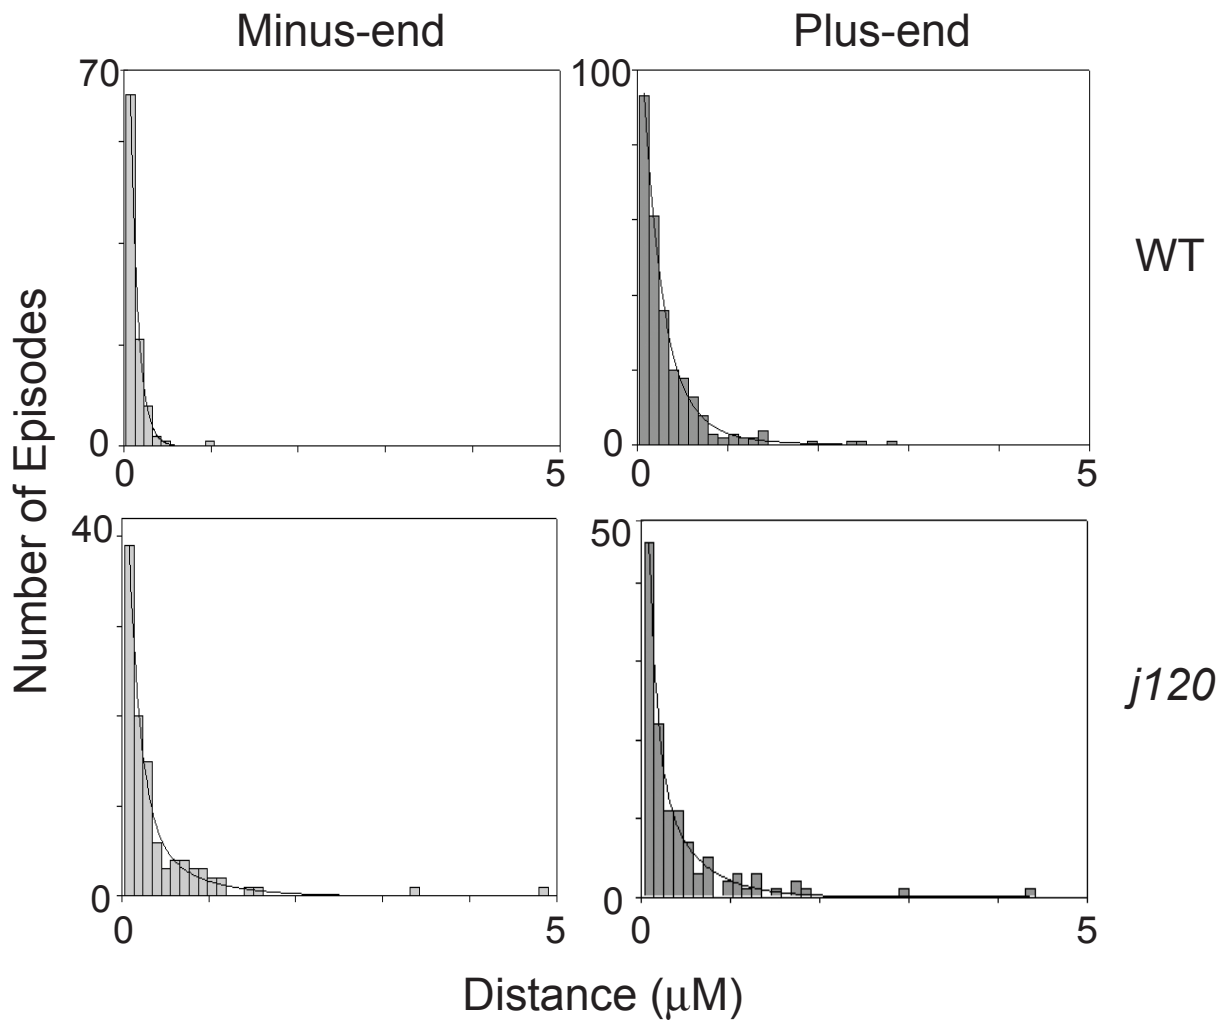

Supplement: NIHMS33117-supplement-01.pdf [file NIHMS33117-supplement-01.pdf]
